# Supplementary material
Source: PubMed Central journal article supplement (PMC3228466)
Supplement: 1117190108_pnas.201117190SI.pdf [file 1117190108_pnas.201117190SI.pdf]

# Supporting Information

Haegens et al. 10.1073/pnas.1117190108

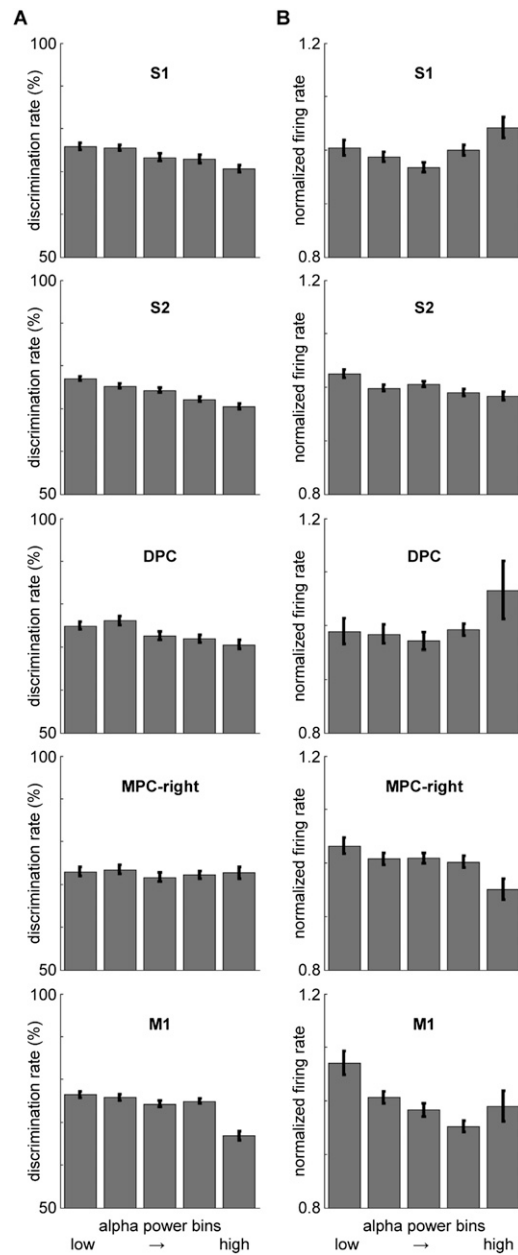

**Fig. S1.**  $\alpha$ -Power predicts task performance and firing rate. (A) Discrimination rate decreased with increasing  $\alpha$ -power during the decision-delay period ( $P < 0.001$ ) for all regions except MPC-right (Fig. 4 and Table S1). (B) Firing rate decreased with increasing  $\alpha$ -power ( $P < 0.001$ ) in S2, MPC-right, and M1, whereas in S1 there was a positive effect ( $P < 0.01$ ). (There was no significant effect in DPC.)

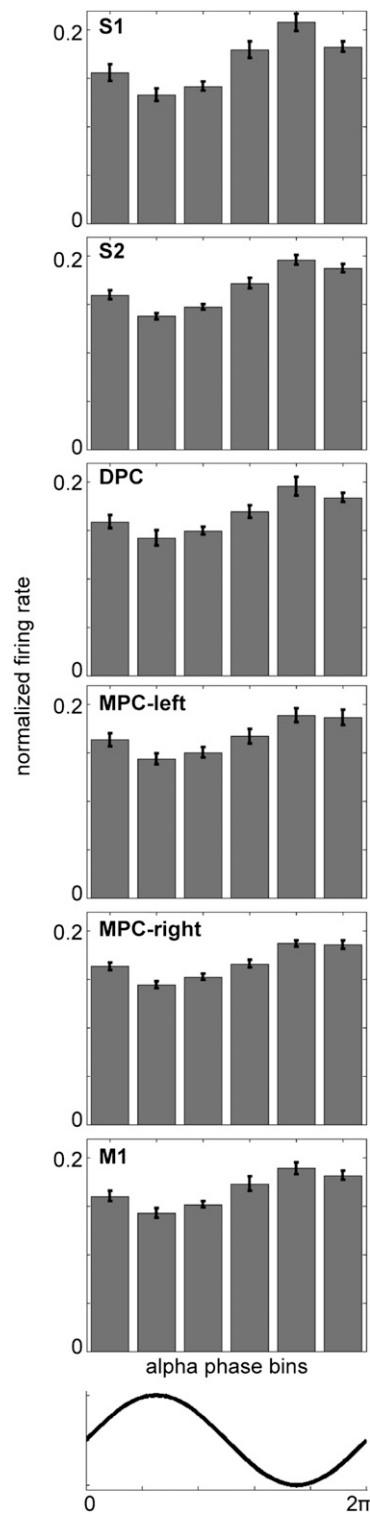

**Fig. S2.** Firing in relation to the  $\alpha$ -cycle. For each recording site,  $\alpha$ -cycles were extracted from the data (retention and decision-delay periods) and divided into six phase bins. For each bin, the normalized firing rate was computed (relative to the average firing rate during that particular cycle). Firing rate was highest at the  $\alpha$ -trough and lowest at the  $\alpha$ -peak (one-way ANOVA,  $P < 0.001$ , in each of the regions).

**Table S1.  $\alpha$ -Power predicts task performance and firing rate**

| Region    | Discrimination rate                   |                                        | Firing rate                          |                       |
|-----------|---------------------------------------|----------------------------------------|--------------------------------------|-----------------------|
|           | One-way ANOVA                         | Post hoc tests                         | One-way ANOVA                        | Post hoc tests        |
| S1        | $F_{(4,460)} = 6.518$<br>$P < 0.001$  | 1, 2 vs. 5                             | $F_{(4,460)} = 4.563$<br>$P < 0.01$  | 3 vs. 5*              |
| S2        | $F_{(4,845)} = 19.265$<br>$P < 0.001$ | 1 vs. 3, 4, 5<br>2 vs. 4, 5<br>3 vs. 5 | $F_{(4,845)} = 5.504$<br>$P < 0.001$ | 1 vs. 4, 5            |
| DPC       | $F_{(4,300)} = 5.177$<br>$P < 0.001$  | 1 vs. 5<br>2 vs. 4, 5                  | $F_{(4,300)} = 1.669$<br>$P = 0.157$ |                       |
| MPC-left  | $F_{(4,390)} = 34.161$<br>$P < 0.001$ | 1, 2, 3 vs. 4<br>1, 2, 3, 4 vs. 5      | $F_{(4,390)} = 5.197$<br>$P < 0.001$ | 1 vs. 4<br>2 vs. 4, 5 |
| MPC-right | $F_{(4,260)} = 0.396$<br>$P = 0.812$  |                                        | $F_{(4,260)} = 4.776$<br>$P < 0.001$ | 1 vs. 5               |
| M1        | $F_{(4,510)} = 25.779$<br>$P < 0.001$ | 1, 2, 3, 4 vs. 5                       | $F_{(4,510)} = 5.687$<br>$P < 0.001$ | 1 vs. 3, 4<br>2 vs. 4 |

DPC, dorsal premotor cortex; M1, primary motor cortex; MPC, medial premotor cortex; S1, primary somatosensory cortex; S2, secondary somatosensory cortex. For each of the regions, a one-way ANOVA was performed, which tested the effect of  $\alpha$ -power level on both discrimination rate and firing rate. Post hoc comparisons using the Games–Howell procedure (which controls for multiple comparisons with unequal population variances) revealed the significantly differing  $\alpha$ -bins (corrected  $P < 0.05$ ). All reported relations are negative (i.e., increasing  $\alpha$ , decreasing discrimination/firing rate) except for S1  $\alpha$ -power that showed a positive effect on firing rate (denoted by an asterisk).
